# Supplementary material for: A Robust Approach for Identification of Cancer Biomarkers and Candidate Drugs
Source: Preprints.org preprint supplement (doi:10.20944/preprints201812.0356.v1), 2018-12-29
Supplement: Supplementary file 2 [file fileA1.xls]

## Sheet: fileA1
GO (Gene Ontology) for biological processess of 2 DE genes
ID:GO:0002933 Name:lipid hydroxylation
C=5; O=1; E=0; R=1625.8; PValue=6.15e-04; FDR=1e+00
userid	Gene Symbol	Gene Name	Entrez Gene
CYP3A4	CYP3A4	cytochrome P450 family 3 subfamily A member 4	1576
ID:GO:0044107 Name:cellular alcohol metabolic process
C=5; O=1; E=0; R=1625.8; PValue=6.15e-04; FDR=1e+00
userid	Gene Symbol	Gene Name	Entrez Gene
CYP3A4	CYP3A4	cytochrome P450 family 3 subfamily A member 4	1576
ID:GO:0044108 Name:cellular alcohol biosynthetic process
C=5; O=1; E=0; R=1625.8; PValue=6.15e-04; FDR=1e+00
userid	Gene Symbol	Gene Name	Entrez Gene
CYP3A4	CYP3A4	cytochrome P450 family 3 subfamily A member 4	1576
ID:GO:0016098 Name:monoterpenoid metabolic process
C=6; O=1; E=0; R=1354.83; PValue=7.38e-04; FDR=1e+00
userid	Gene Symbol	Gene Name	Entrez Gene
CYP3A4	CYP3A4	cytochrome P450 family 3 subfamily A member 4	1576
ID:GO:0042368 Name:vitamin D biosynthetic process
C=11; O=1; E=0; R=739; PValue=1.35e-03; FDR=1e+00
userid	Gene Symbol	Gene Name	Entrez Gene
CYP3A4	CYP3A4	cytochrome P450 family 3 subfamily A member 4	1576
ID:GO:0042738 Name:exogenous drug catabolic process
C=11; O=1; E=0; R=739; PValue=1.35e-03; FDR=1e+00
userid	Gene Symbol	Gene Name	Entrez Gene
CYP3A4	CYP3A4	cytochrome P450 family 3 subfamily A member 4	1576
ID:GO:0009820 Name:alkaloid metabolic process
C=14; O=1; E=0; R=580.64; PValue=1.72e-03; FDR=1e+00
userid	Gene Symbol	Gene Name	Entrez Gene
CYP3A4	CYP3A4	cytochrome P450 family 3 subfamily A member 4	1576
ID:GO:0042737 Name:drug catabolic process
C=14; O=1; E=0; R=580.64; PValue=1.72e-03; FDR=1e+00
userid	Gene Symbol	Gene Name	Entrez Gene
CYP3A4	CYP3A4	cytochrome P450 family 3 subfamily A member 4	1576
ID:GO:0042362 Name:fat-soluble vitamin biosynthetic process
C=14; O=1; E=0; R=580.64; PValue=1.72e-03; FDR=1e+00
userid	Gene Symbol	Gene Name	Entrez Gene
CYP3A4	CYP3A4	cytochrome P450 family 3 subfamily A member 4	1576
ID:GO:0070989 Name:oxidative demethylation
C=14; O=1; E=0; R=580.64; PValue=1.72e-03; FDR=1e+00
userid	Gene Symbol	Gene Name	Entrez Gene
CYP3A4	CYP3A4	cytochrome P450 family 3 subfamily A member 4	1576
C: the number of reference genes in the category
O: the number of genes in the gene set and also in the category
E: the expected number in the category
R: ratio of enrichment
PValue: p value from hypergeometric test
FDR: False discovery rate
