# Supplementary material for: A Robust Approach for Identification of Cancer Biomarkers and Candidate Drugs
Source: Preprints.org preprint supplement (doi:10.20944/preprints201812.0356.v1), 2018-12-29
Supplement: Supplementary file 3 [file fileA2.xls]

## Sheet: fileA2
GO (Gene Ontology) for molecular functions of 2 DE genes
ID:GO:0101020 Name:estrogen 16-alpha-hydroxylase activity
C=5; O=1; E=0; R=1634; PValue=6.12e-04; FDR=1e+00
userid	Gene Symbol	Gene Name	Entrez Gene
CYP3A4	CYP3A4	cytochrome P450 family 3 subfamily A member 4	1576
ID:GO:0016725 Name:oxidoreductase activity, acting on CH or CH2 groups
C=10; O=1; E=0; R=817; PValue=1.22e-03; FDR=1e+00
userid	Gene Symbol	Gene Name	Entrez Gene
CYP3A4	CYP3A4	cytochrome P450 family 3 subfamily A member 4	1576
ID:GO:0070330 Name:aromatase activity
C=22; O=1; E=0; R=371.36; PValue=2.69e-03; FDR=1e+00
userid	Gene Symbol	Gene Name	Entrez Gene
CYP3A4	CYP3A4	cytochrome P450 family 3 subfamily A member 4	1576
ID:GO:0016712 Name:oxidoreductase activity, acting on paired donors, with incorporation or reduction of molecular oxygen, reduced flavin or flavoprotein as one donor, and incorporation of one atom of oxygen
C=25; O=1; E=0; R=326.8; PValue=3.06e-03; FDR=1e+00
userid	Gene Symbol	Gene Name	Entrez Gene
CYP3A4	CYP3A4	cytochrome P450 family 3 subfamily A member 4	1576
ID:GO:0008395 Name:steroid hydroxylase activity
C=33; O=1; E=0; R=247.58; PValue=4.04e-03; FDR=1e+00
userid	Gene Symbol	Gene Name	Entrez Gene
CYP3A4	CYP3A4	cytochrome P450 family 3 subfamily A member 4	1576
ID:GO:0016709 Name:oxidoreductase activity, acting on paired donors, with incorporation or reduction of molecular oxygen, NAD(P)H as one donor, and incorporation of one atom of oxygen
C=40; O=1; E=0; R=204.25; PValue=4.89e-03; FDR=1e+00
userid	Gene Symbol	Gene Name	Entrez Gene
CYP3A4	CYP3A4	cytochrome P450 family 3 subfamily A member 4	1576
ID:GO:0019825 Name:oxygen binding
C=46; O=1; E=0.01; R=177.61; PValue=5.62e-03; FDR=1e+00
userid	Gene Symbol	Gene Name	Entrez Gene
CYP3A4	CYP3A4	cytochrome P450 family 3 subfamily A member 4	1576
ID:GO:0005496 Name:steroid binding
C=87; O=1; E=0.01; R=93.91; PValue=1.06e-02; FDR=1e+00
userid	Gene Symbol	Gene Name	Entrez Gene
CYP3A4	CYP3A4	cytochrome P450 family 3 subfamily A member 4	1576
ID:GO:0004497 Name:monooxygenase activity
C=93; O=1; E=0.01; R=87.85; PValue=1.14e-02; FDR=1e+00
userid	Gene Symbol	Gene Name	Entrez Gene
CYP3A4	CYP3A4	cytochrome P450 family 3 subfamily A member 4	1576
ID:GO:0020037 Name:heme binding
C=125; O=1; E=0.02; R=65.36; PValue=1.52e-02; FDR=1e+00
userid	Gene Symbol	Gene Name	Entrez Gene
CYP3A4	CYP3A4	cytochrome P450 family 3 subfamily A member 4	1576
C: the number of reference genes in the category
O: the number of genes in the gene set and also in the category
E: the expected number in the category
R: ratio of enrichment
PValue: p value from hypergeometric test
FDR: False discovery rate
